# Supplementary material
Source: publisher figshare collection journal article supplement (https://acs.figshare.com/ndownloader/files/24030862)
Supplement: Supplementary file 1 [file 24030862]

## ***Supporting Information***

### **Surface Micelle Structures and Monolayer Compression**

### **Moduli of Double Hydrophilic Block Copolymer**

Wenting Pan,<sup>a</sup> Hongxu Chen,<sup>a</sup> Gangyao Wen,<sup>a,\*</sup> Despoina Giaouzi,<sup>b</sup>

Stergios Pispas,<sup>b</sup> Jintao Zuo<sup>a</sup>

*<sup>a</sup> Department of Polymer Materials and Engineering, College of Material Science and Engineering, Harbin University of Science and Technology, 4 Linyuan Road, Harbin 150040, PR China*

*<sup>b</sup> Theoretical and Physical Chemistry Institute, National Hellenic Research Foundation, 48 Vassileos Constantinou Avenue, Athens 11635, Greece*

---

\* Corresponding author. E-mail: gywen@hrbust.edu.cn.  
Website: <http://wengangyao.polymer.cn/>.

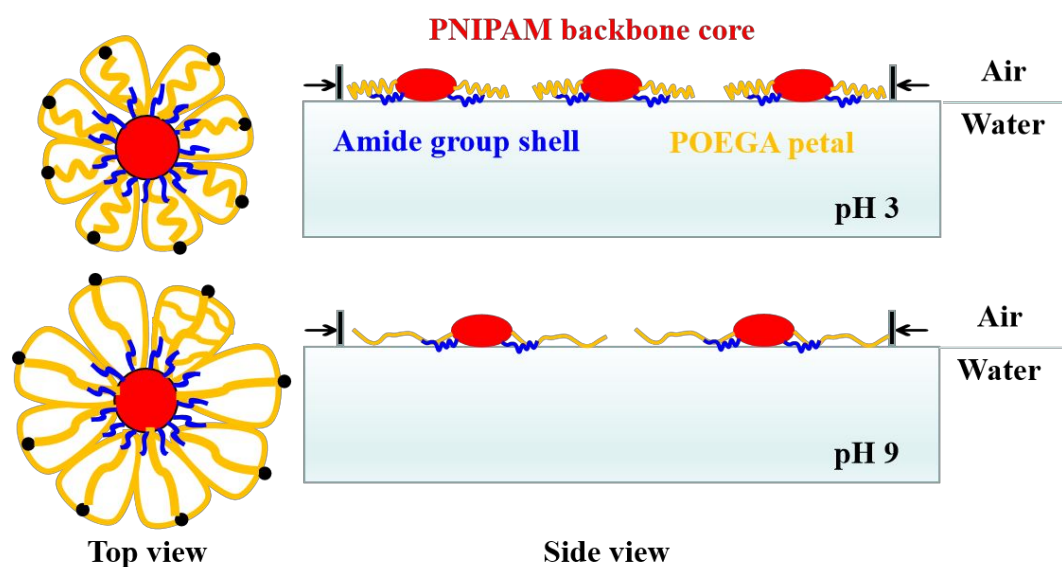

**Figure S1.** Schematic diagram of the sunflower-like micelle structures under acidic and alkaline subphase conditions. Different parts in the micelles are not given in strict proportions corresponding to their relative length. Furthermore, the parts of shells under the cores are not shown.

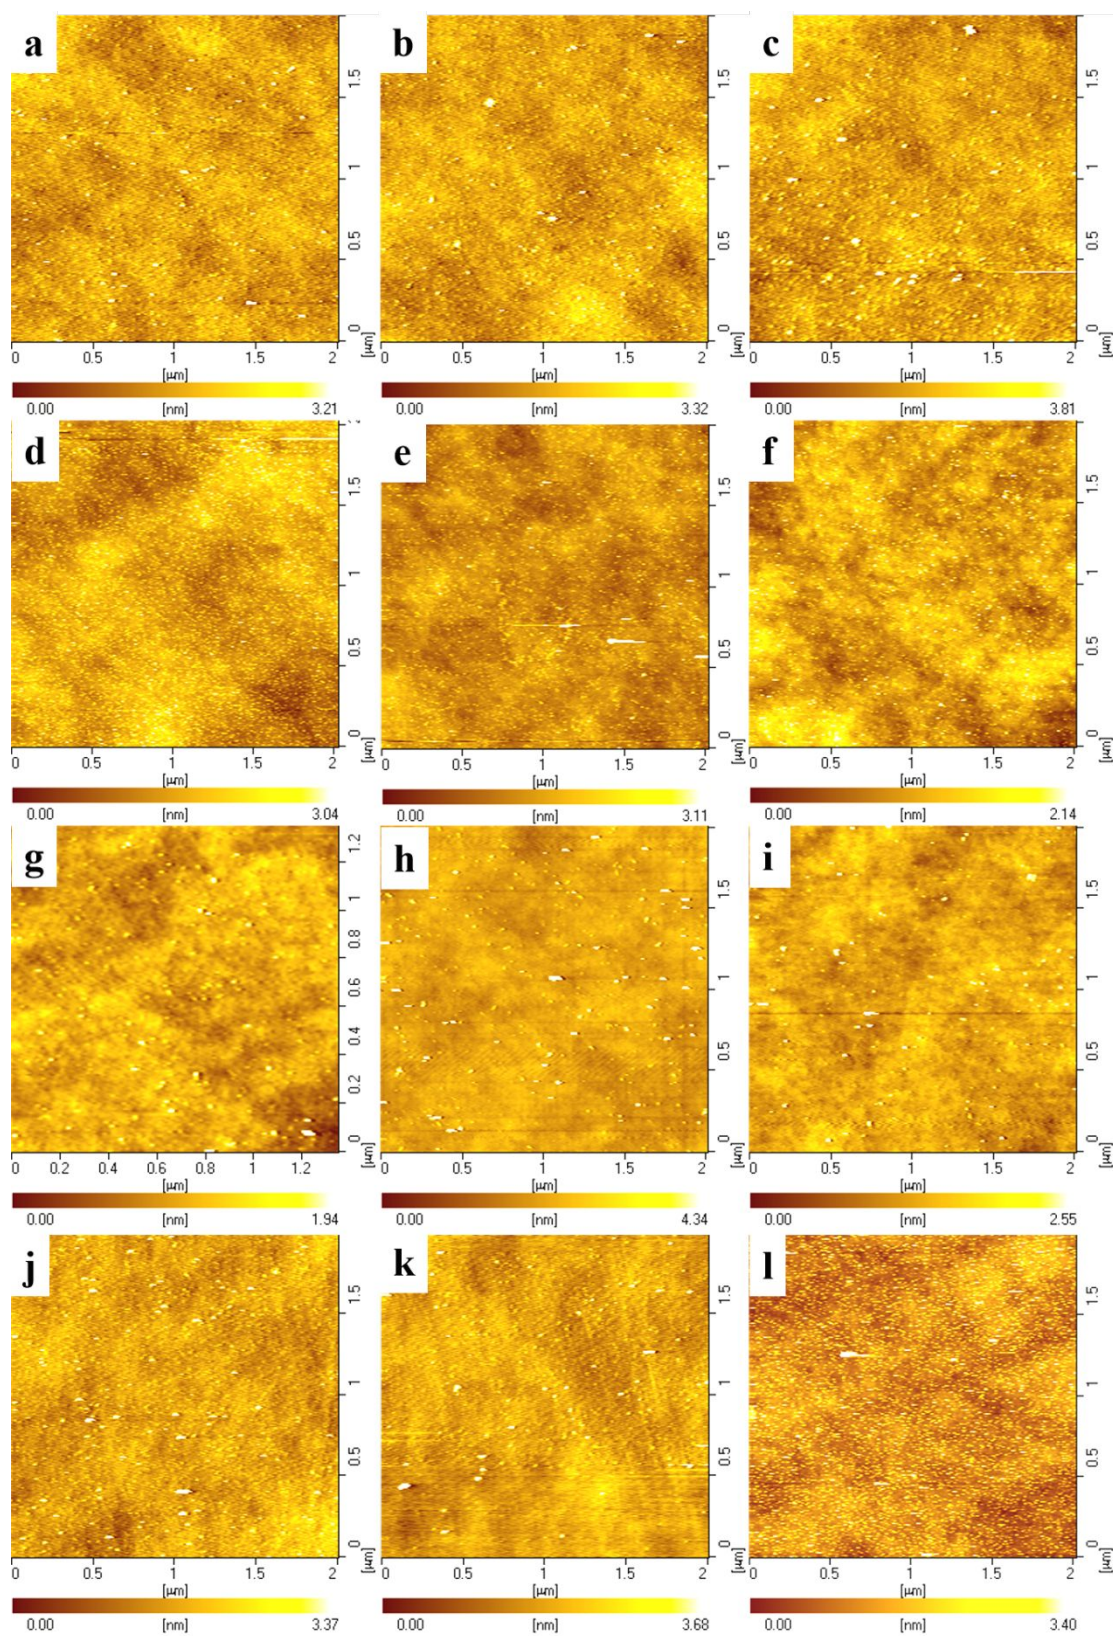

**Figure S2.** AFM height images of the LB films of PNIPAM-*b*-POEGA transferred from acidic subphases at 10 (a–c), 20 (d–f), 30 (g–i), and 35 °C (j–l). Transfer conditions are at initial mma (a, d, g, j), 2 (b, e, h, k), and 20 mN/m (c, f, i, l).



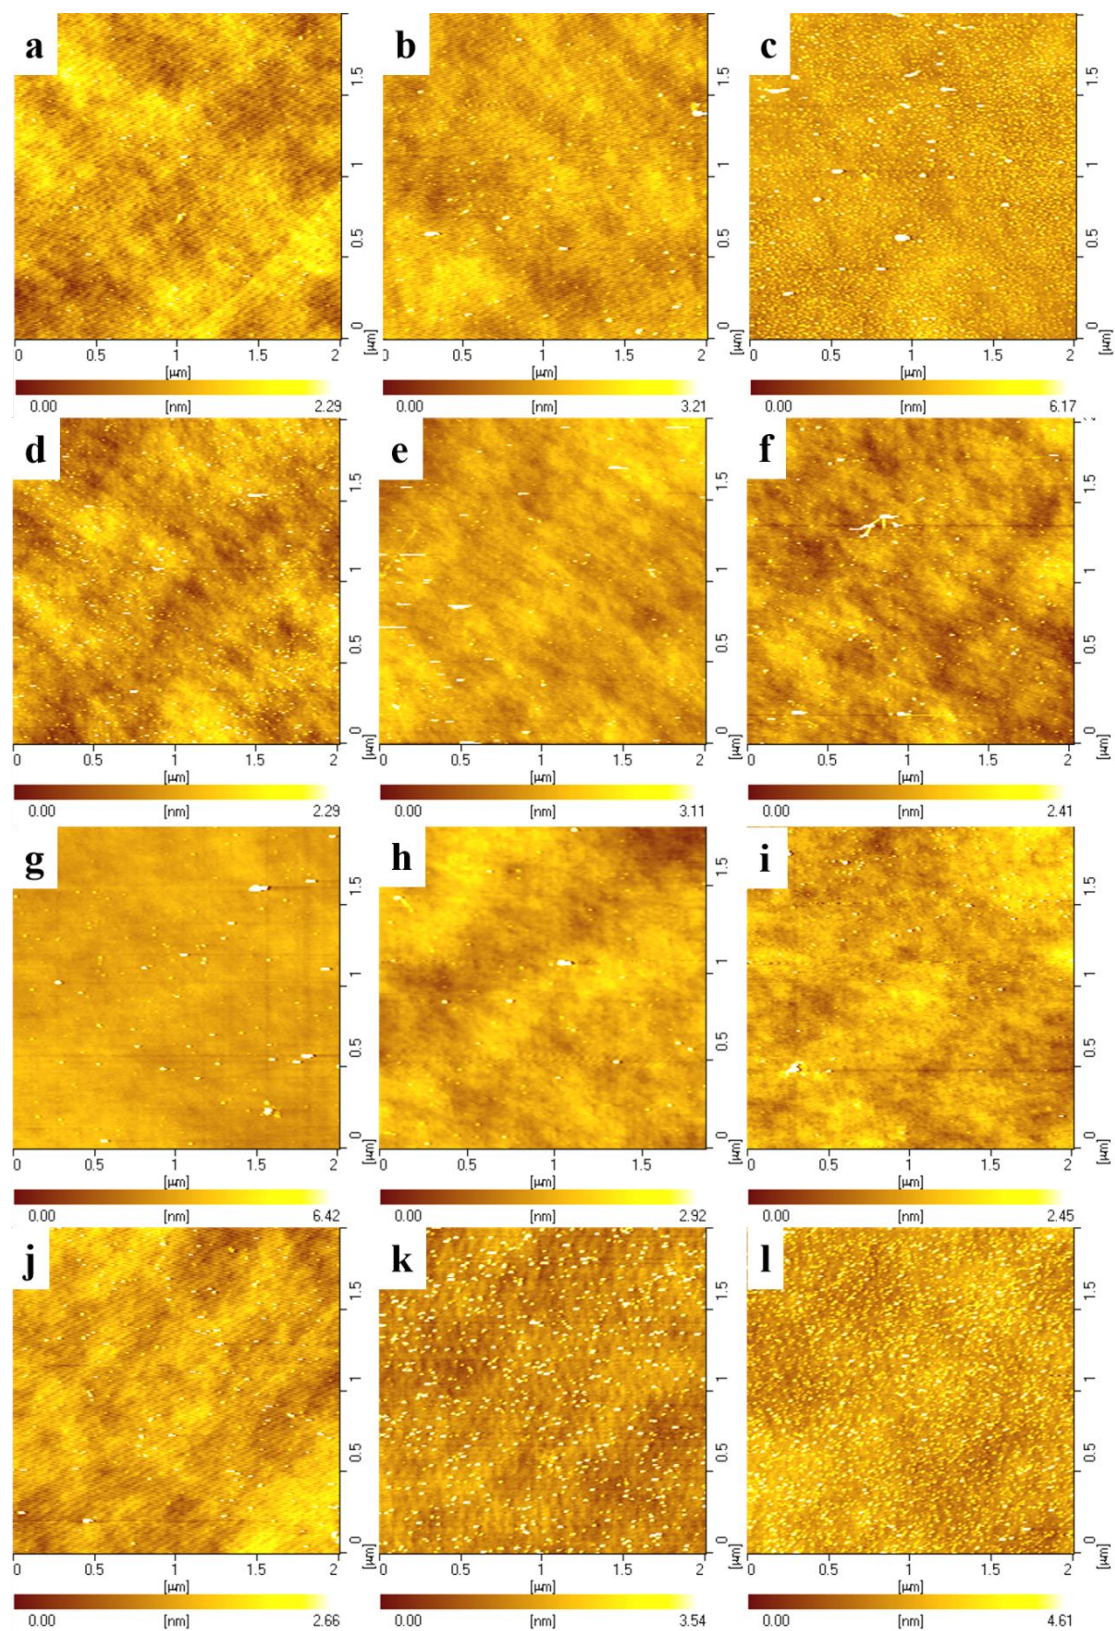

**Figure S3.** AFM height images of the LB films of PNIPAM-*b*-POEGA transferred from alkaline subphases at 10 (a–c), 20 (d–f), 30 (g–i), and 35 °C (j–l). Transfer conditions are at initial mma (a, d, g, j), 2 (b, e, h, k), and 20 mN/m (c, f, i, l).
